# Supplementary material
Source: publisher figshare collection journal article supplement (https://tandf.figshare.com/ndownloader/files/24463246)
Supplement: Supplementary file 1 [file 24463246]

Appendix 1. Summary of baseline patient characteristic inputs.

| Patient baseline | Value | Standard Error | References |
| --- | --- | --- | --- |
| Current Age (Years) | 56.40 | 7.30 | (1) |
| Proportion of females | 0.47 | 0.15 | (1) |
| Duration of diabetes (Years) | 6.40 | 2.15 | (1) |
| Height (m) | 1.60 | NA | (1, 2, 3) |
| Proportion of smokers | 0.25 | 0.14 | (1) |
| Modifiable risk factors |  |  |  |
| HbA1c (%) | 8.01 | 0.88 | (1) |
| Total-Cholesterol (mg/dL) | 192.29 | NA | (4, 5) |
| HDL Cholesterol (mg/dL) | 45.97 | NA | (1) |
| LDL Cholesterol (mg/dL) | 112.18 | NA | (1) |
| Systolic blood pressure (mmHg) | 131.73 | 7.25 | (1) |
| Weight (kg) | 77.50 | NA | (2) |

NA: not available in references, assumed to be zero.

References

1. CADTH: New Drugs for Type 2 Diabetes: Second-Line Therapy – Science Report. In *CADTH therapeutic review.* *Volume* 4, no.1b. Ottawa: CADTH; 2017
2. UK Prospective Diabetes Study(UKPDS) Group: Intensive blood-glucose control with sulphonylureas or insulin compared with conventional treatment and risk of complications in patients with type 2 diabetes (UKPDS 33). *Lancet* 1998, 352:837-853.
3. Hall DM, Cole TJ: What use is the BMI? *Arch Dis Child* 2006, 91:283-286.
4. Chen YW: The relationships of diabetes medication on the risk of acute myocardial infarction, stroke, heart failure, and death in patients with type 2 diabetes - Participants in National Diabetes Care Management Program. *master's thesis.* China Medical University, 2013.
5. Friedewald WT, Levy RI, Fredrickson DS: Estimation of the Concentration of Low-Density Lipoprotein Cholesterol in Plasma, Without Use of the Preparative Ultracentrifuge. *Clin Chem* 1972, 18:499.
